# Supplementary material for: Hypoxia and metabolic inhibitors alter the intracellular ATP:ADP ratio and membrane potential in human coronary artery smooth muscle cells
Source: PeerJ. 2020 Nov 10;8:e10344. doi: 10.7717/peerj.10344 (PMC7664465; doi:10.7717/peerj.10344)
Supplement: Supplemental Information 12 [file peerj-08-10344-s012.xlsx]

## Sheet: Sheet1
Time (min)	F/F0
2	1
5	1.0104
8	0.975619
9	0.956615
12	0.837218
14	0.862316
16	0.839728
19	0.838293
22	0.842237
24	0.804948
26	0.817497
29	0.779849
32	0.75009
35	0.73754
37	0.721047
39	0.749731
43	0.694873
45	0.66834
48	0.587666
51	0.596988
54	0.600932
56	0.545715
58	0.703119
61	0.723557
64	0.802797
67	0.801362
72	0.844747
75	0.832556
79	0.999283
80	0.97777
