# Supplementary material for: Hypoxia and metabolic inhibitors alter the intracellular ATP:ADP ratio and membrane potential in human coronary artery smooth muscle cells
Source: PeerJ. 2020 Nov 10;8:e10344. doi: 10.7717/peerj.10344 (PMC7664465; doi:10.7717/peerj.10344)
Supplement: Supplemental Information 32 [file peerj-08-10344-s032.xlsx]

## Sheet: Sheet1
Time (min)	F/F0(488 nm)
0	1	1	1	1	1	1	1	1	1	1
1	0.970331	0.970213	0.963545	0.989899	0.961071	0.99318	0.977171	1.00154	0.952923	1.01886
2	0.962539	0.955871	1.04618	1.01507	1.01449	1.00391	0.996567	1.02788	0.991943	0.960989
3	0.967984	0.979935	0.994909	1.06375	1.00041	1.02001	0.99691	1.03249	0.990837	0.972441
4	0.965449	0.991864	1.04236	0.982282	0.964384	1.05199	1.00069	1.0411	0.911058	1.00893
5	0.963853	1.00738	1.04455	1.03312	1.00828	1.06753	1.05158	1.03259	0.967141	0.985877
6	0.940287	1.00365	1.081	1.02649	1.03134	1.04584	1.04428	1.04223	0.903633	0.974426
7	1.02178	1.01089	1.01464	1.0255	1.04252	1.09671	1.06325	1.09685	0.994945	1.01924
8	1.06516	1.03282	1.14446	1.08809	1.06902	1.17911	1.12839	1.16481	1.02986	1.11688
9	1.13201	1.1035	1.19345	1.14738	1.08628	1.29539	1.17782	1.24188	1.14471	1.19467
10	1.15698	1.17031	1.28164	1.21245	1.17338	1.33486	1.21498	1.32079	1.22322	1.26117
11	1.22899	1.20672	1.31464	1.31479	1.32882	1.45349	1.30269	1.36835	1.25592	1.37881
12	1.24477	1.21009	1.41118	1.34708	1.25649	1.45517	1.32784	1.43138	1.24581	1.38033
13	1.24486	1.22837	1.33927	1.36745	1.25594	1.40049	1.37204	1.40781	1.26256	1.37262
14	1.29227	1.27112	1.34746	1.38119	1.32027	1.42509	1.37685	1.44573	1.26382	1.44454
15	1.30805	1.25022	1.35045	1.41166	1.28838	1.44108	1.35865	1.44122	1.25972	1.42393
