# Supplementary material for: Hypoxia and metabolic inhibitors alter the intracellular ATP:ADP ratio and membrane potential in human coronary artery smooth muscle cells
Source: PeerJ. 2020 Nov 10;8:e10344. doi: 10.7717/peerj.10344 (PMC7664465; doi:10.7717/peerj.10344)
Supplement: Supplemental Information 39 [file peerj-08-10344-s039.xlsx]

## Sheet: Sheet1
Gliben	Gliben+Anti
0.97	1.01
1.03	1.02
0.97	1.11
1	1.01
0.97	1.07
0.98	0.95
1	1
1.01	1.04
1.14	1.05
0.96	0.97
0.95	1.07
0.94	1.05
1	1.03
1.03	1.02
1.01	0.99
0.99	1.07
1	0.97
1.07	1.01
1.01	1
1.02	1.09
0.99	1.12
1.02	0.99
