# Supplementary material for: Hypoxia and metabolic inhibitors alter the intracellular ATP:ADP ratio and membrane potential in human coronary artery smooth muscle cells
Source: PeerJ. 2020 Nov 10;8:e10344. doi: 10.7717/peerj.10344 (PMC7664465; doi:10.7717/peerj.10344)
Supplement: Supplemental Information 51 [file peerj-08-10344-s051.xlsx]

## Sheet: Sheet1
Basal			NH4Cl			Wash
1.01937	0.982217	1.09852	1.66781	1.68245	1.30386	0.929566	0.835104	1.04266
