# Supplementary material for: Hypoxia and metabolic inhibitors alter the intracellular ATP:ADP ratio and membrane potential in human coronary artery smooth muscle cells
Source: PeerJ. 2020 Nov 10;8:e10344. doi: 10.7717/peerj.10344 (PMC7664465; doi:10.7717/peerj.10344)
Supplement: Supplemental Information 63 [file peerj-08-10344-s063.xlsx]

## Sheet: Sheet1
m (mV)	F/F0(488 nm)
-60	1.13977	0.956571	0.945706
-41	2.00171	1.94452	1.70008
-15	2.42385	2.57458	2.55826
